# Supplementary material for: Synthesis and Biological Evaluation of Potential Oncoimmunomodulator Agents
Source: MDPI journal article supplement (doi:10.3390/ijms24032614), 2023-01-30

# **Title   Synthesis and Biological Evaluation of Potential Oncoimmunomodulator Agents**

**Authors**   Raquel Gil-Edo<sup>1</sup>, Sara Espejo<sup>1</sup>, Eva Falomir<sup>1\*</sup> and Miguel Carda<sup>1</sup>

## ***Supporting Information***

### ***Contents:***

***Graphical NMR spectra..... - 7 -***

## Graphical NMR spectra

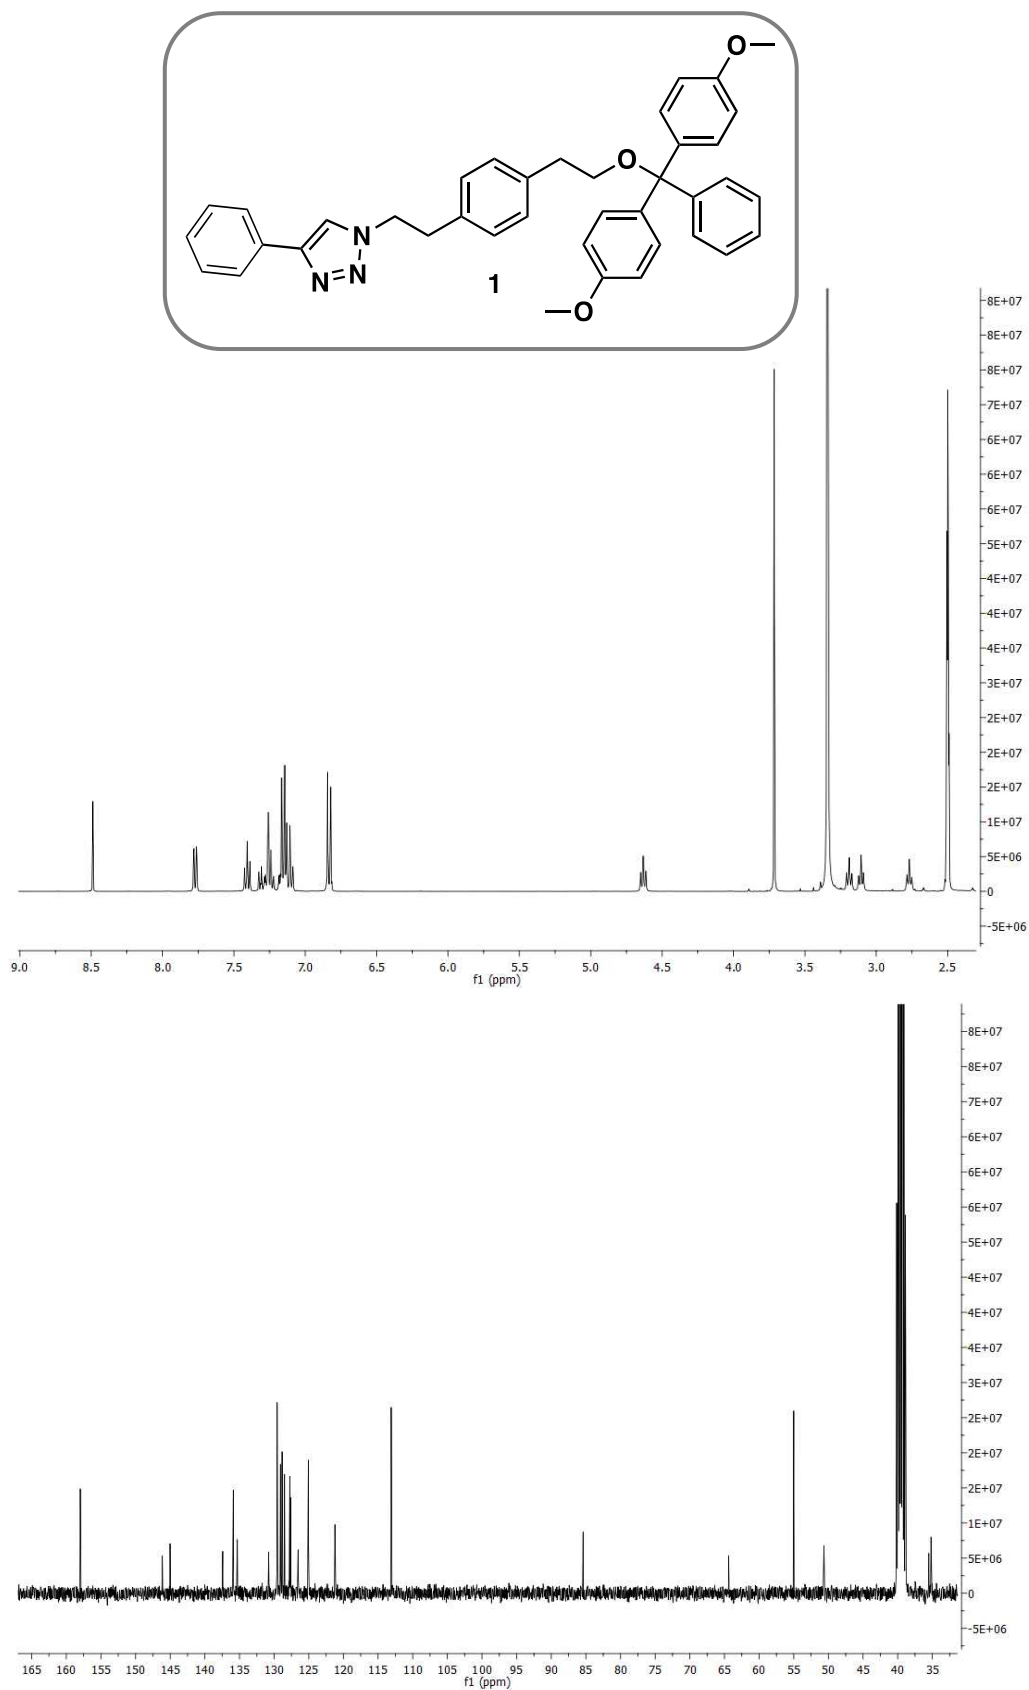

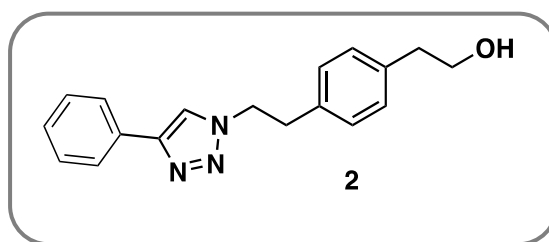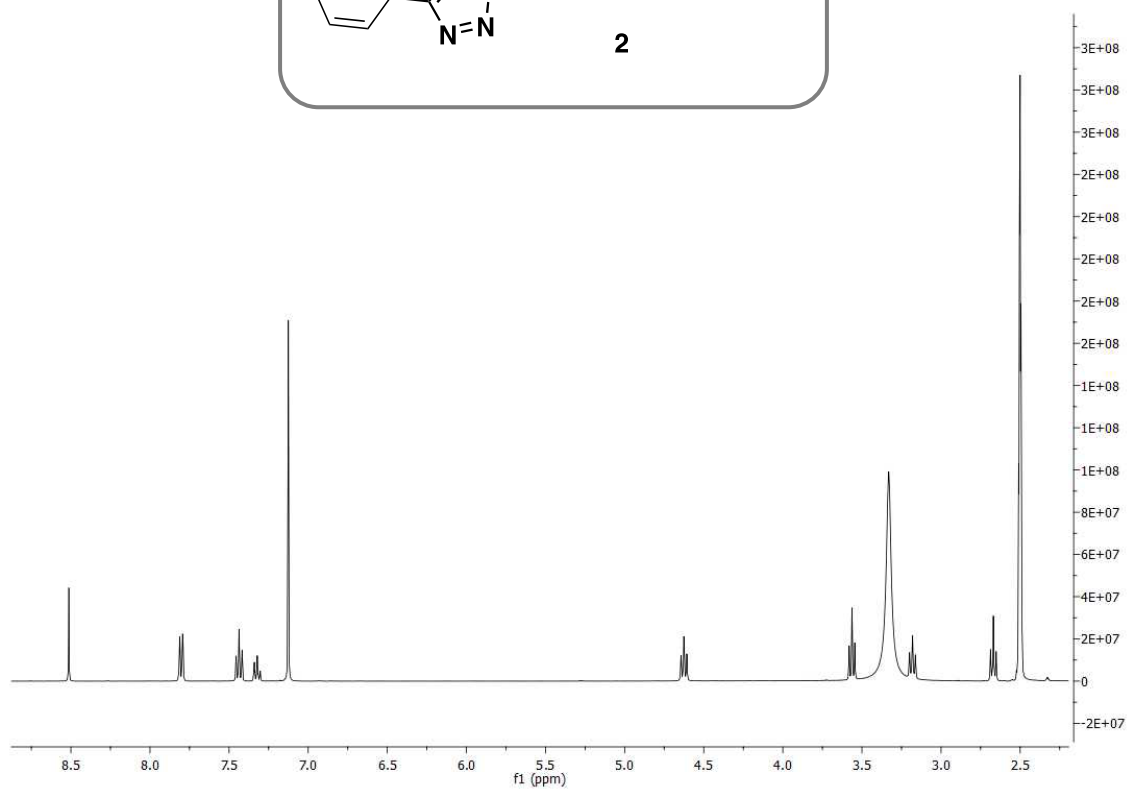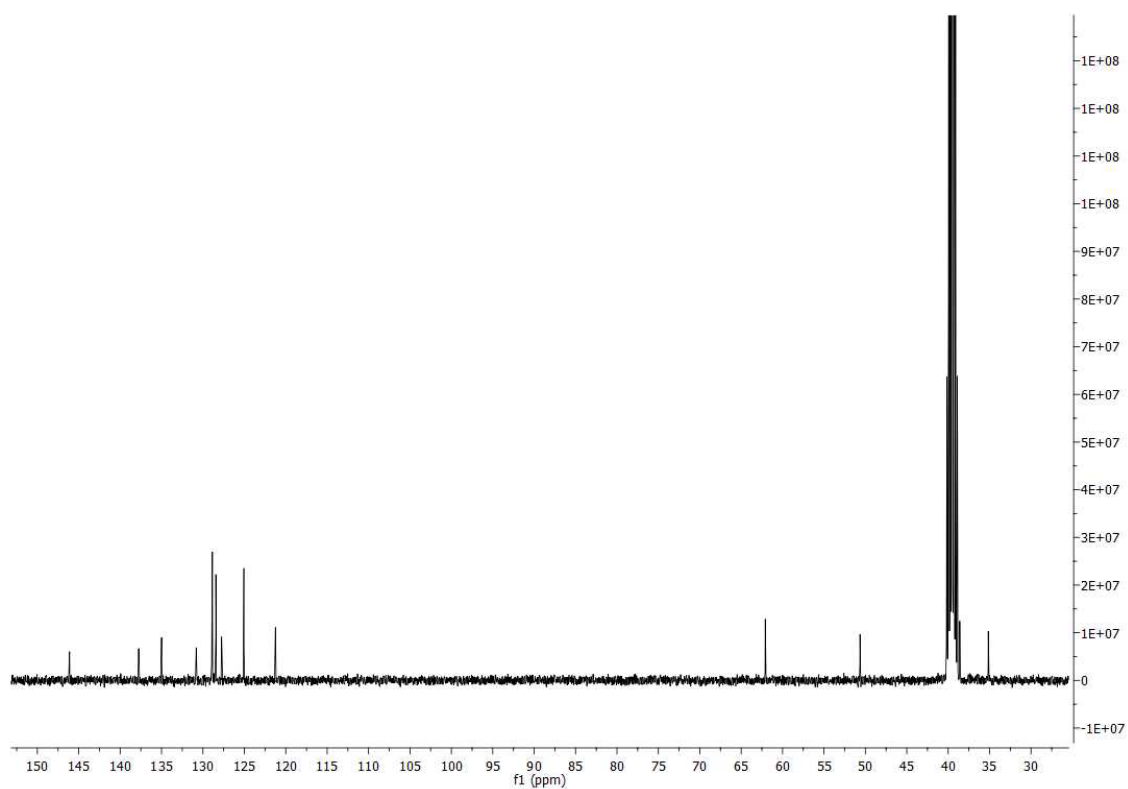

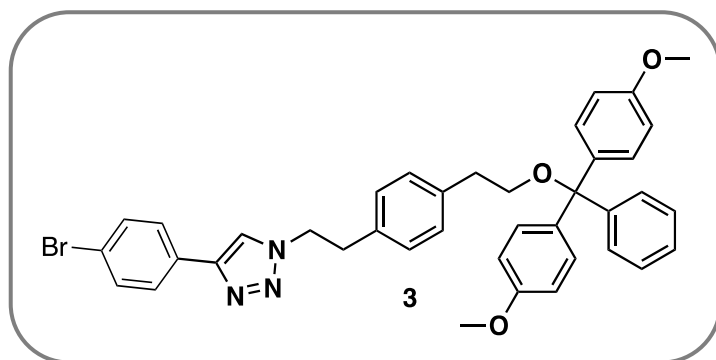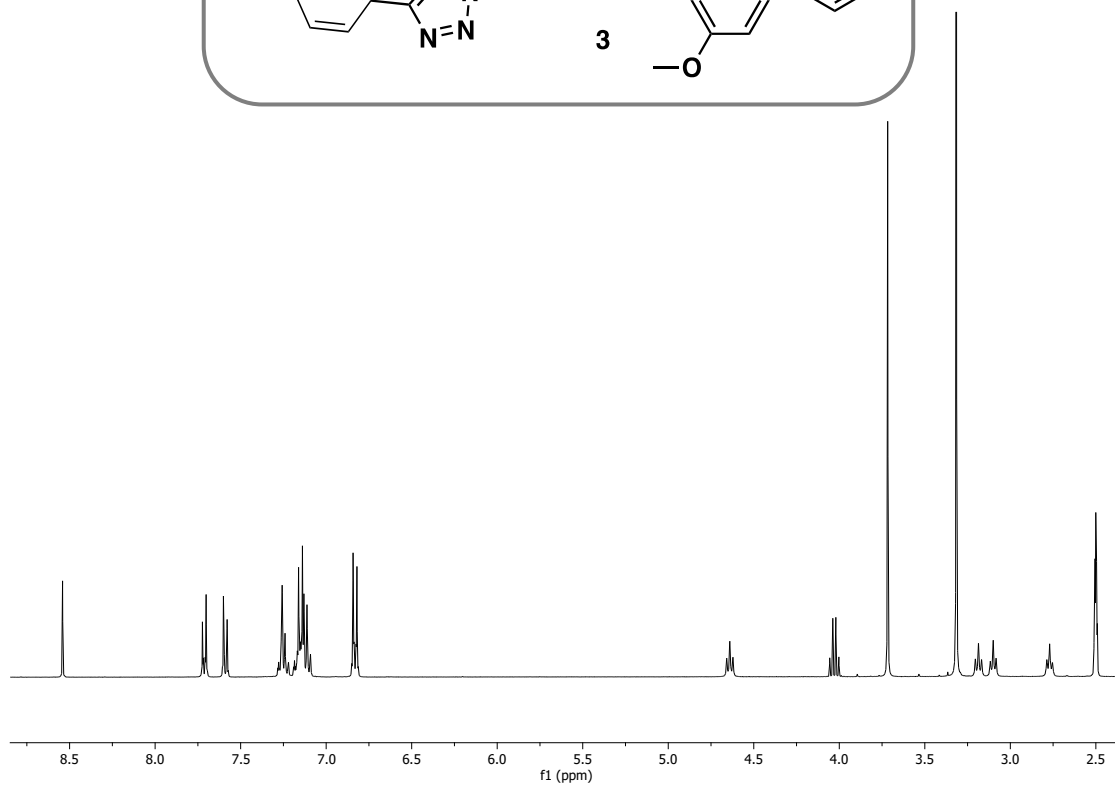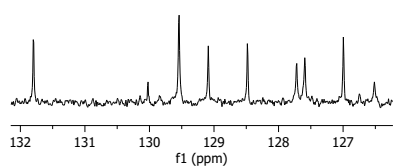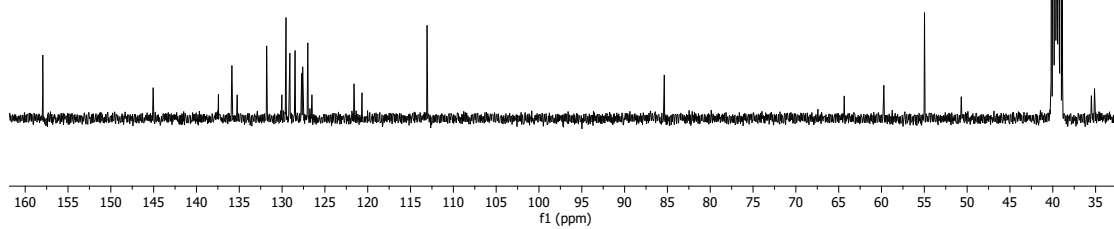

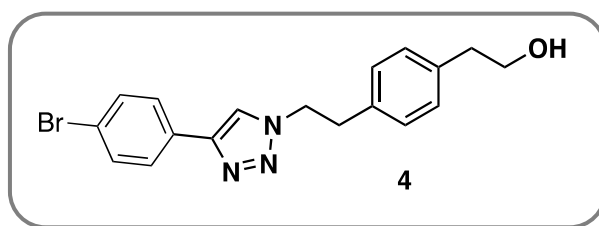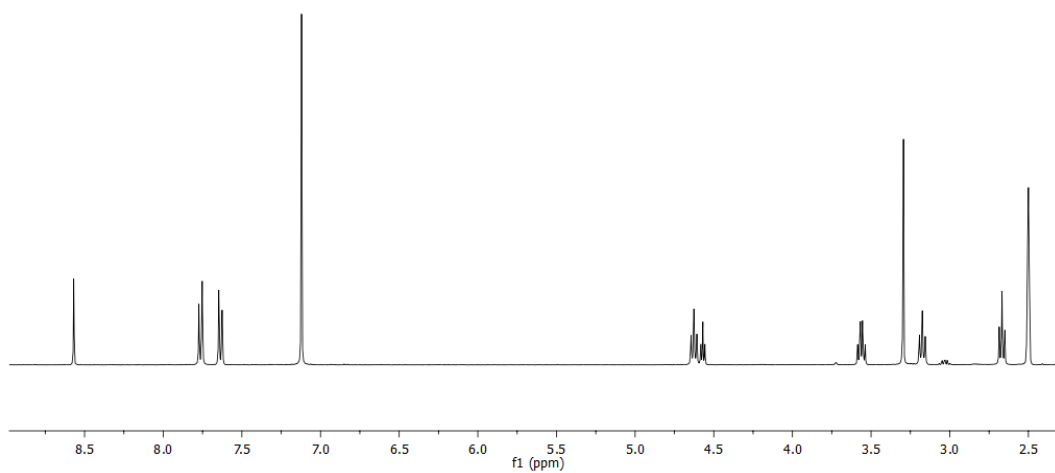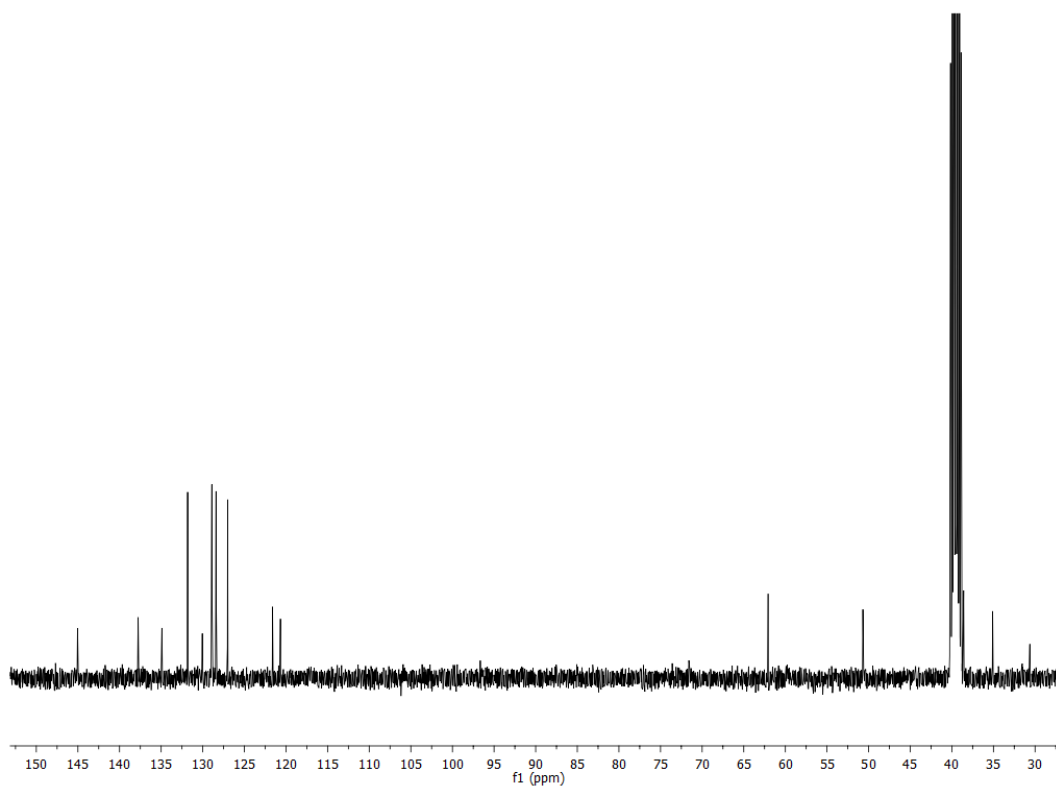

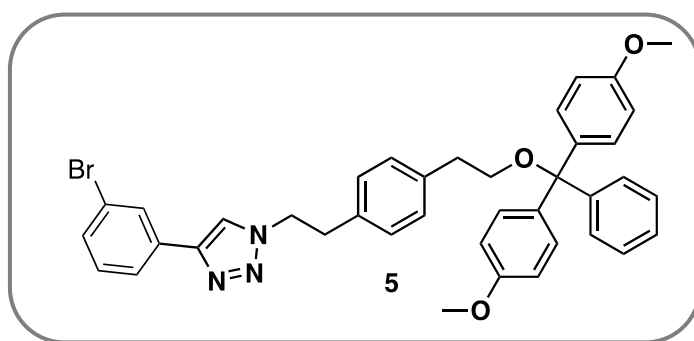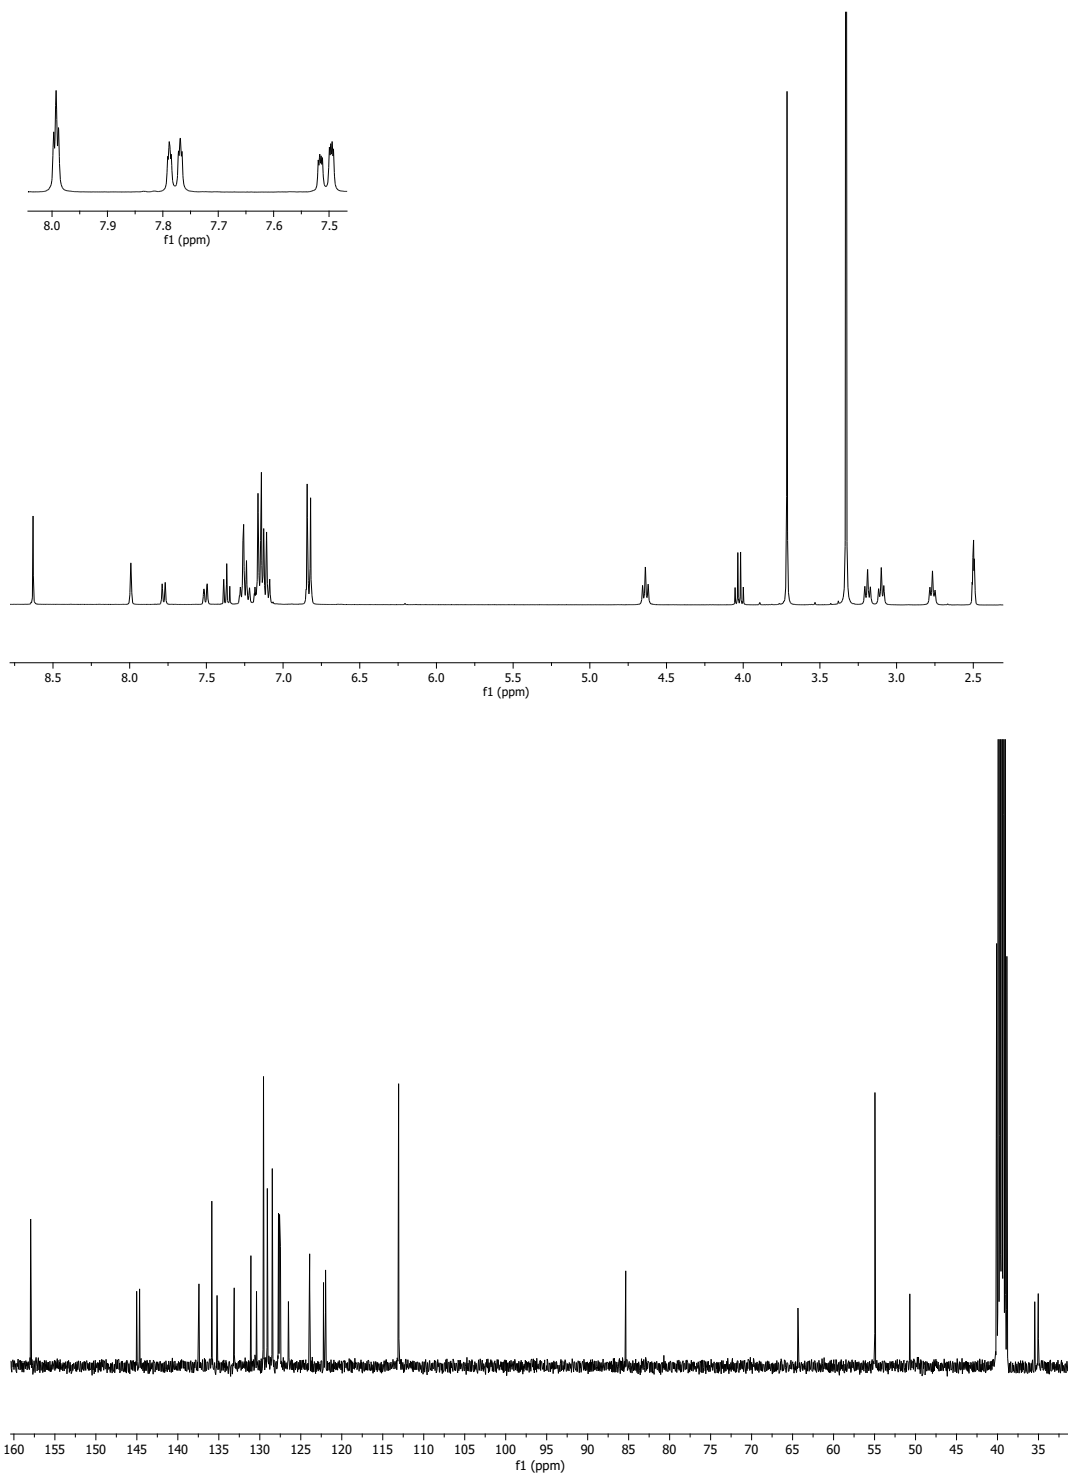

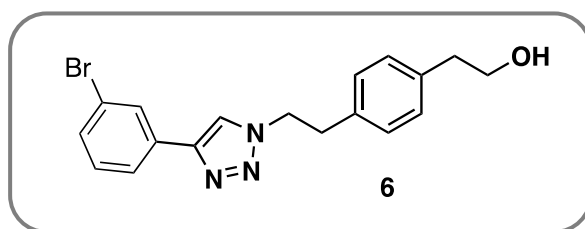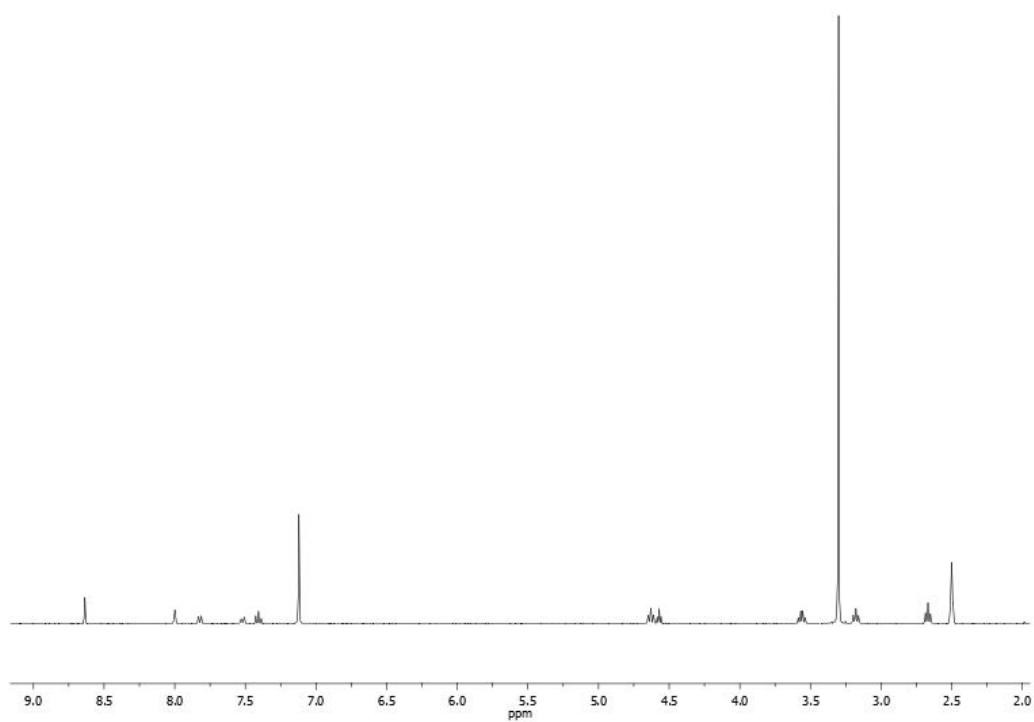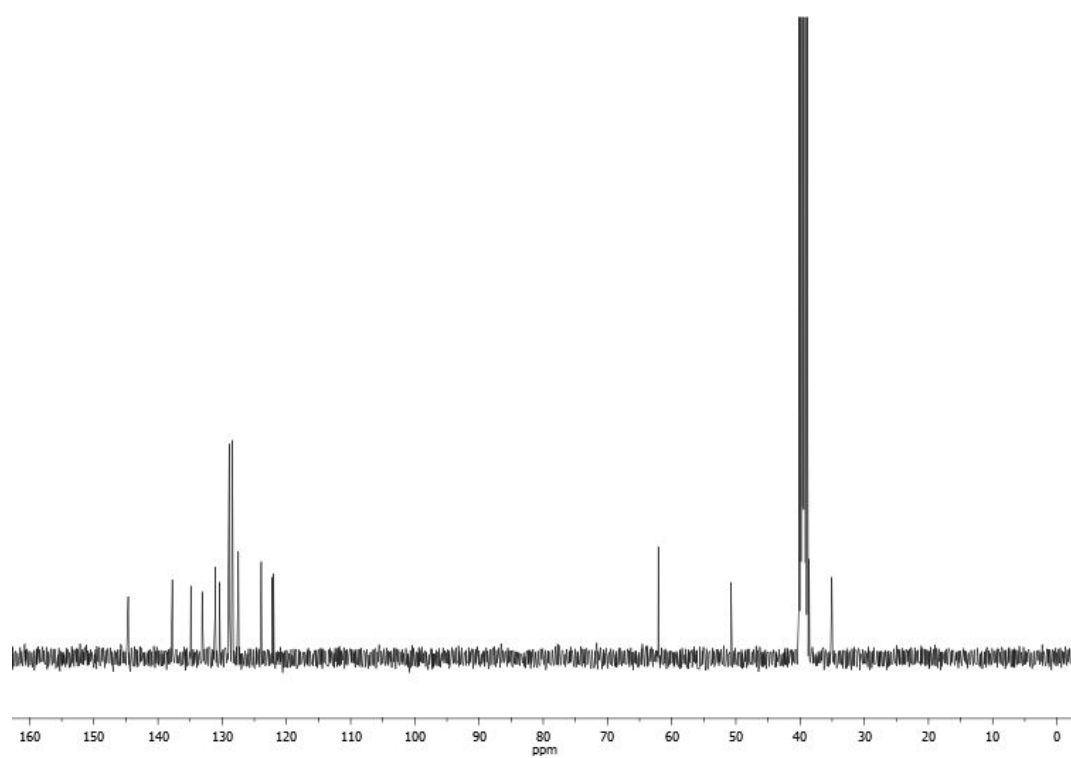

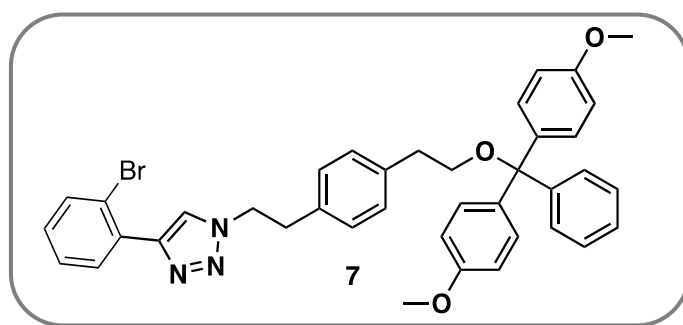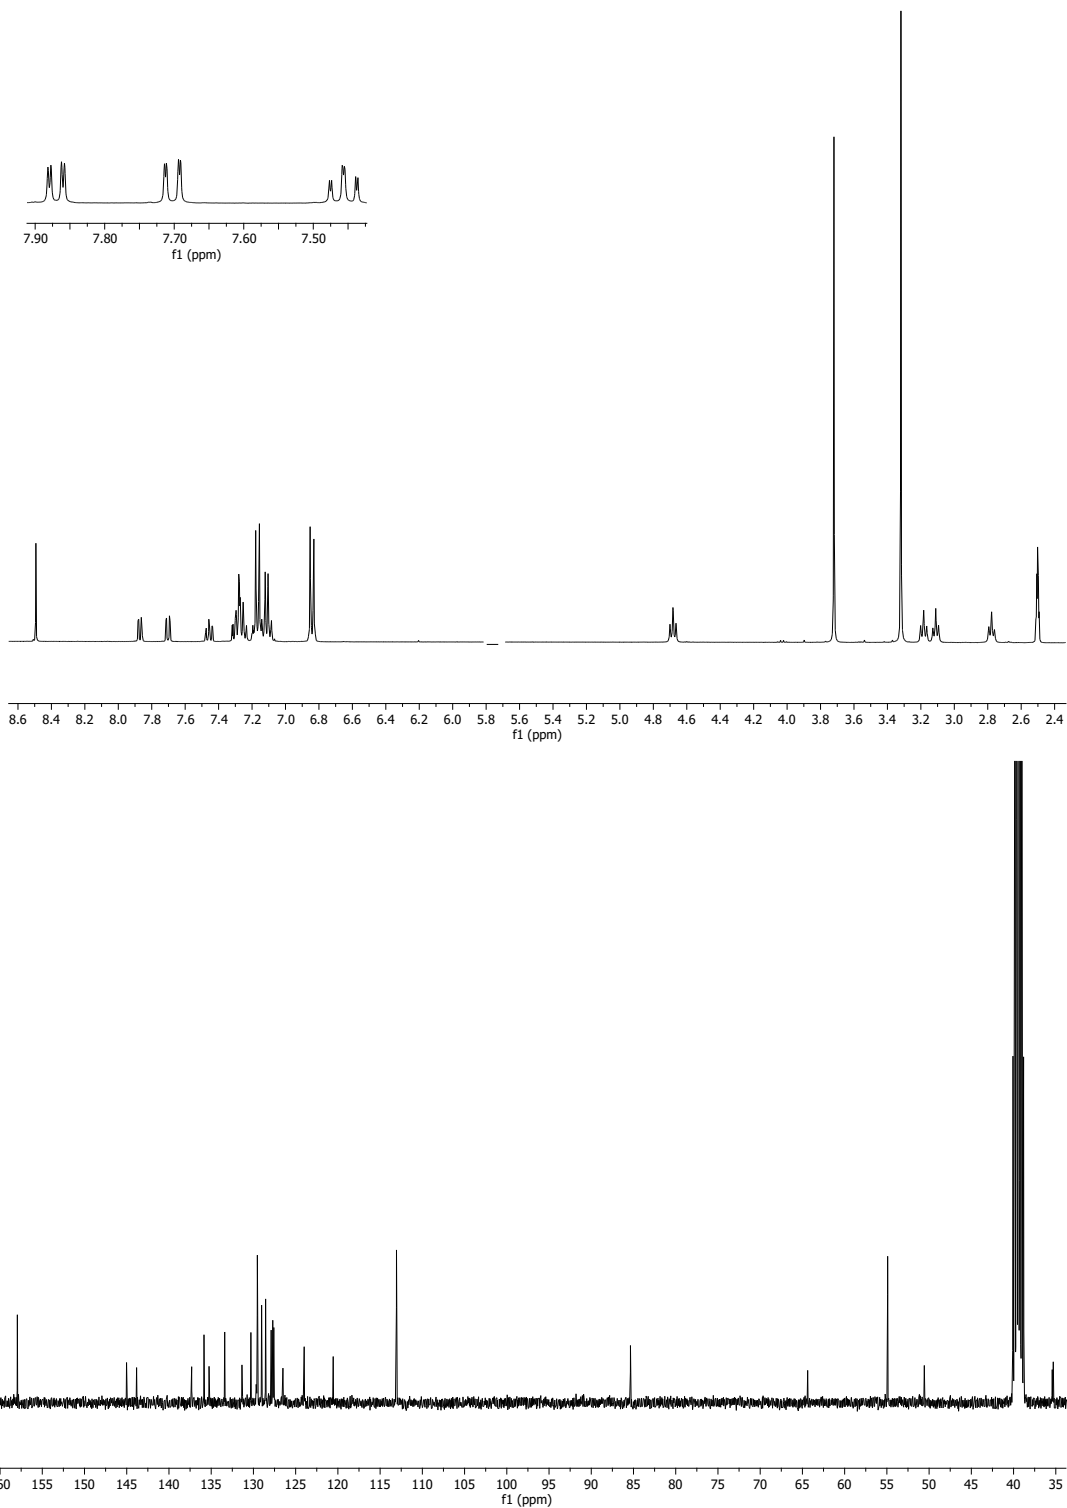



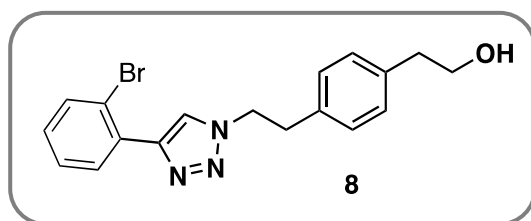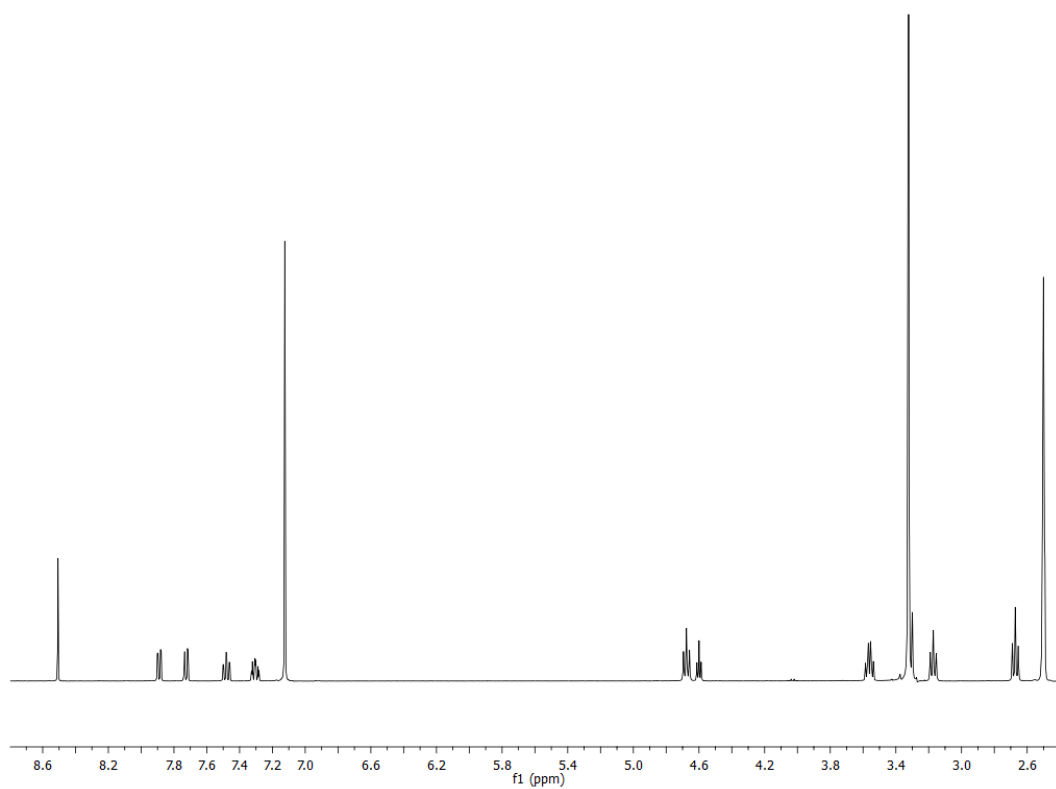

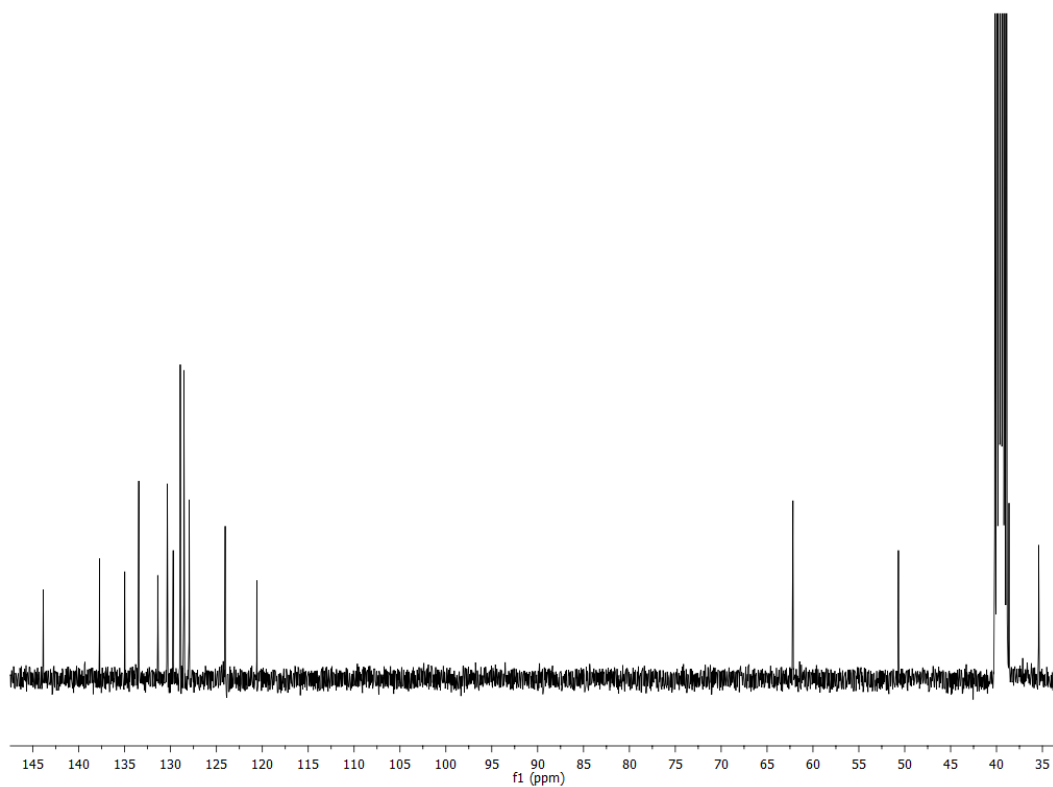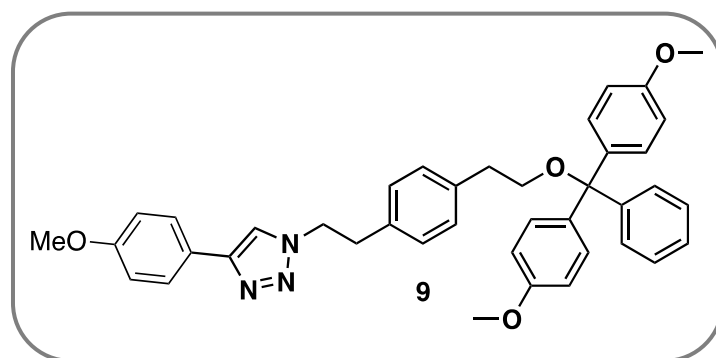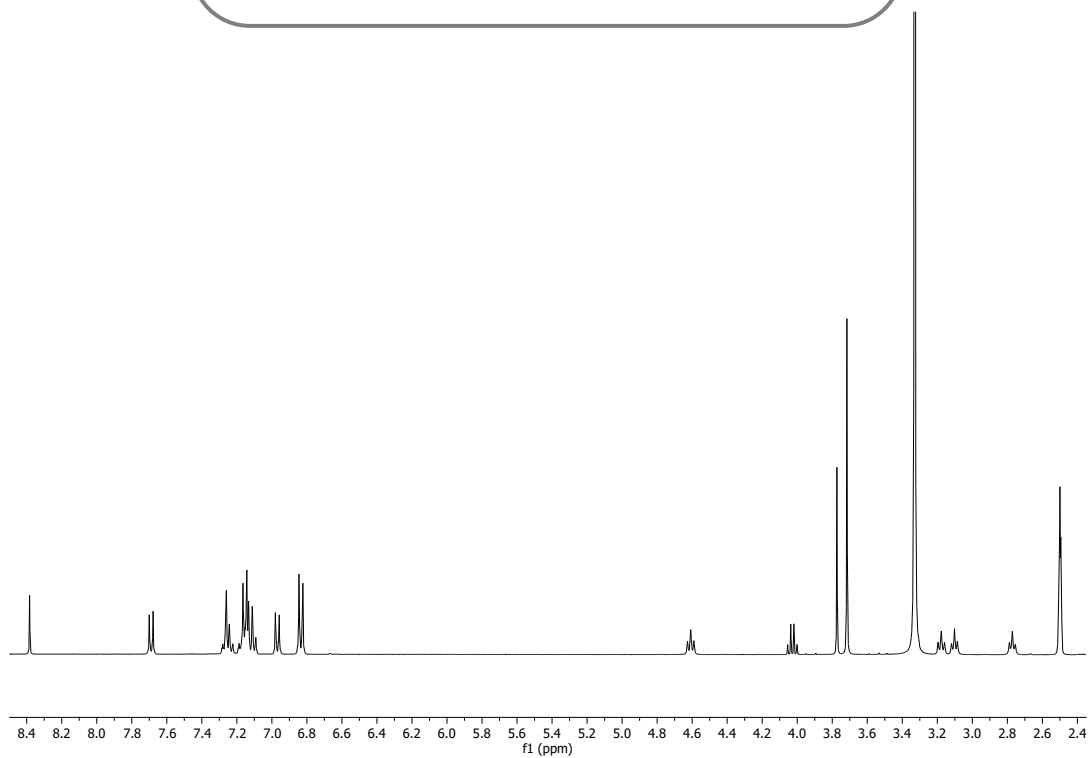

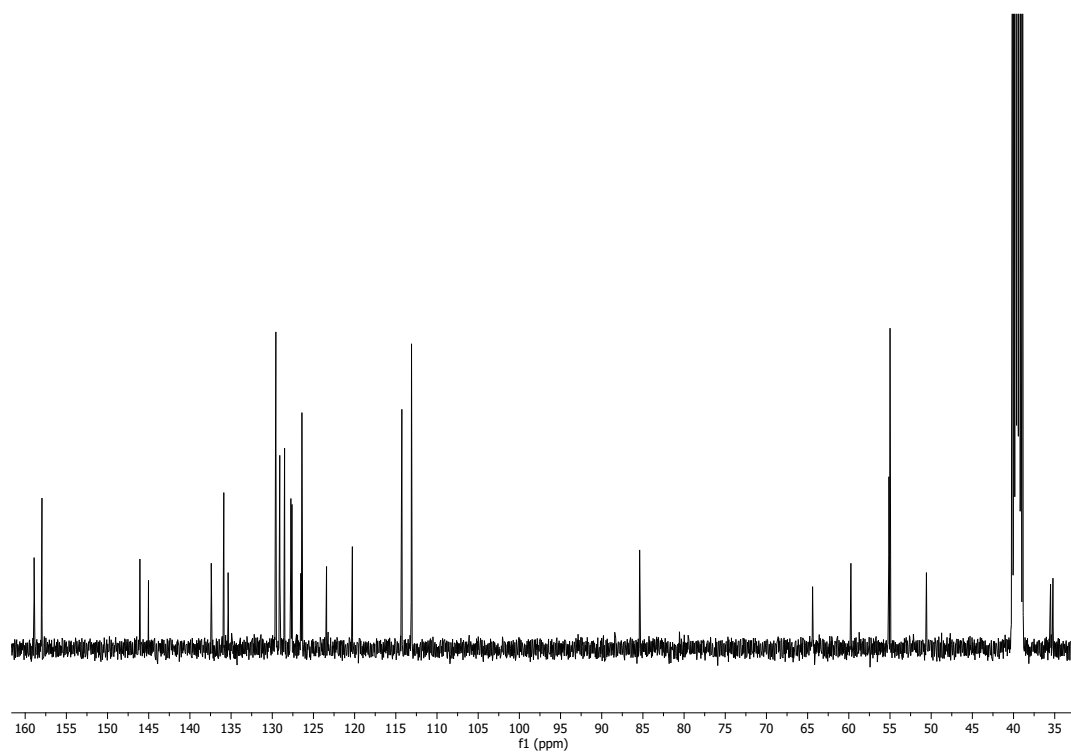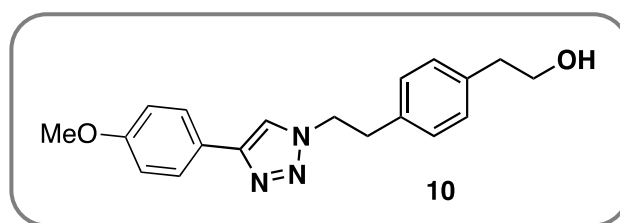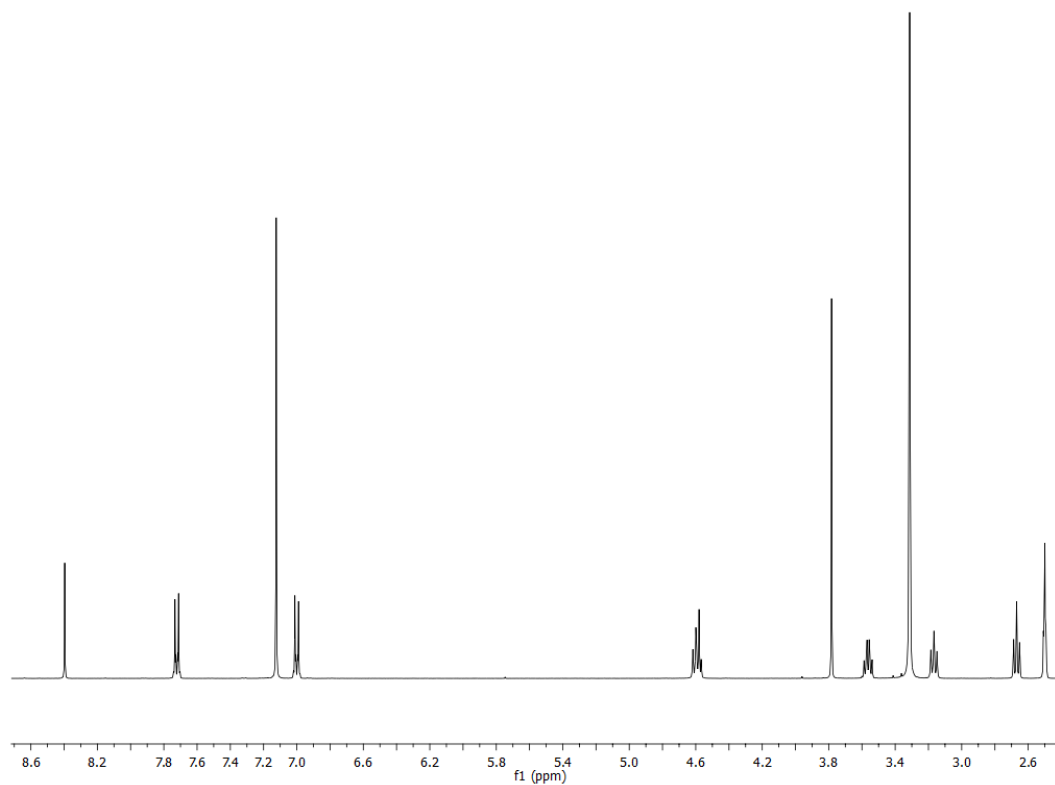

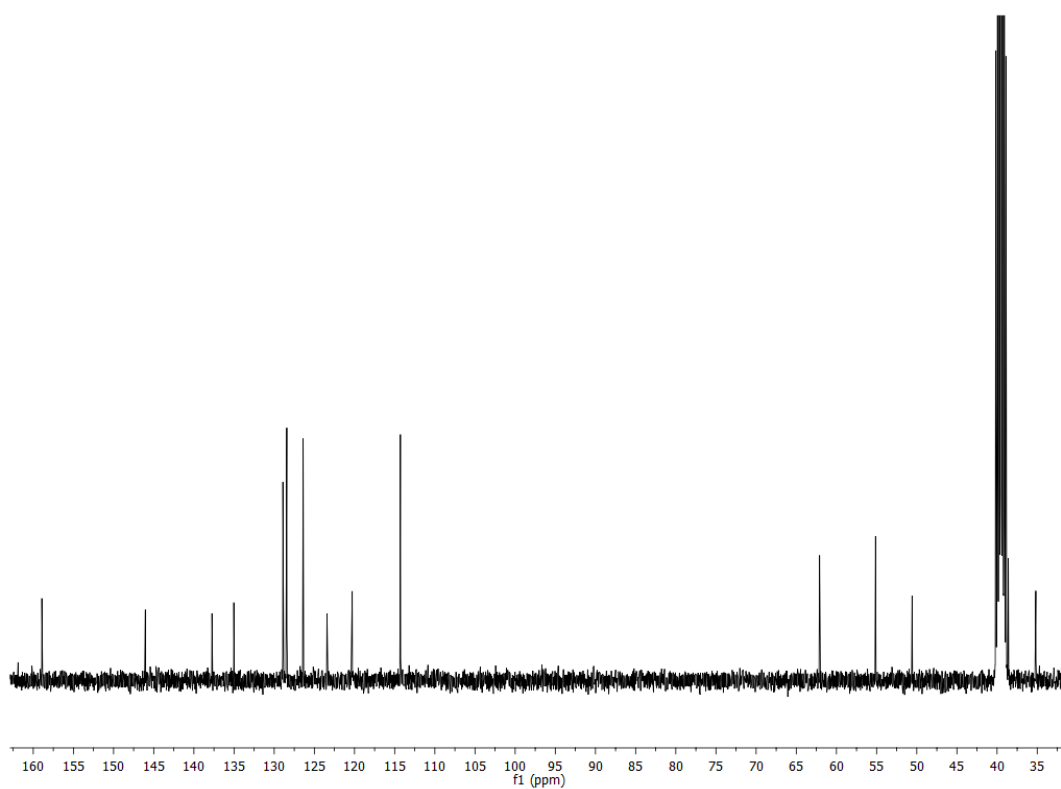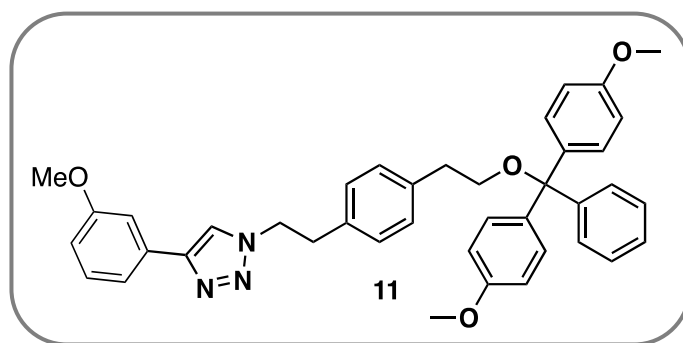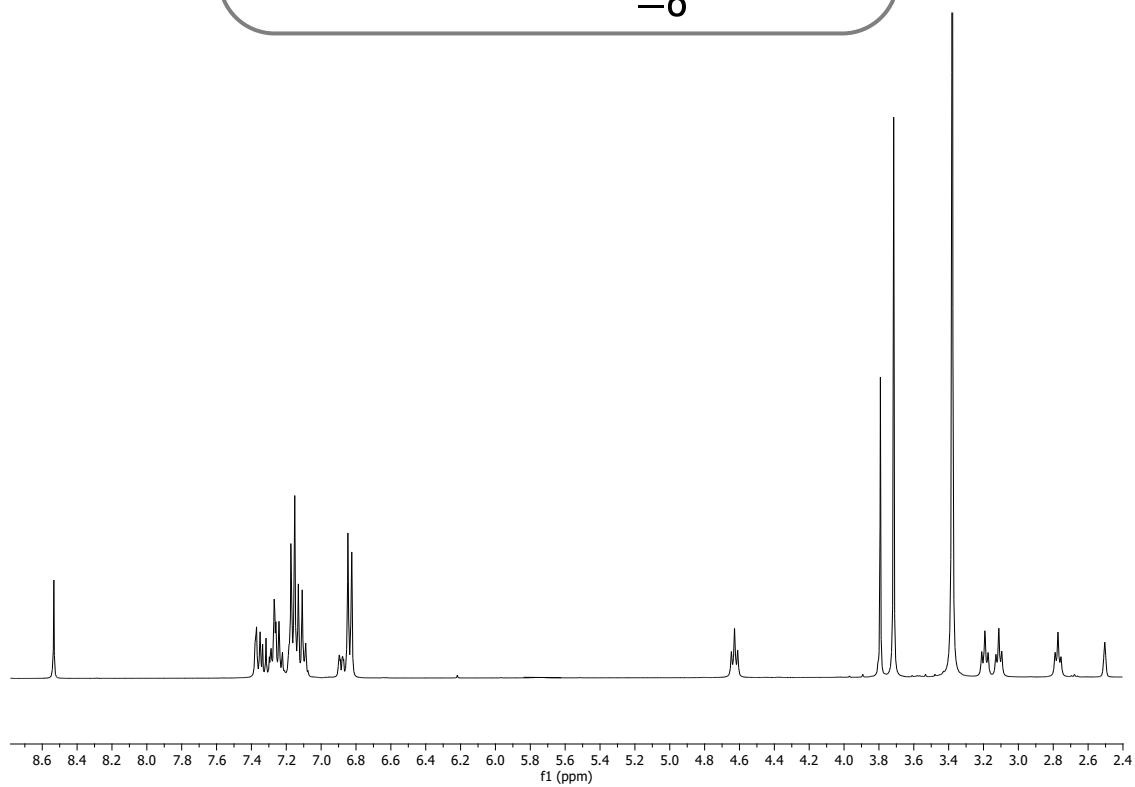

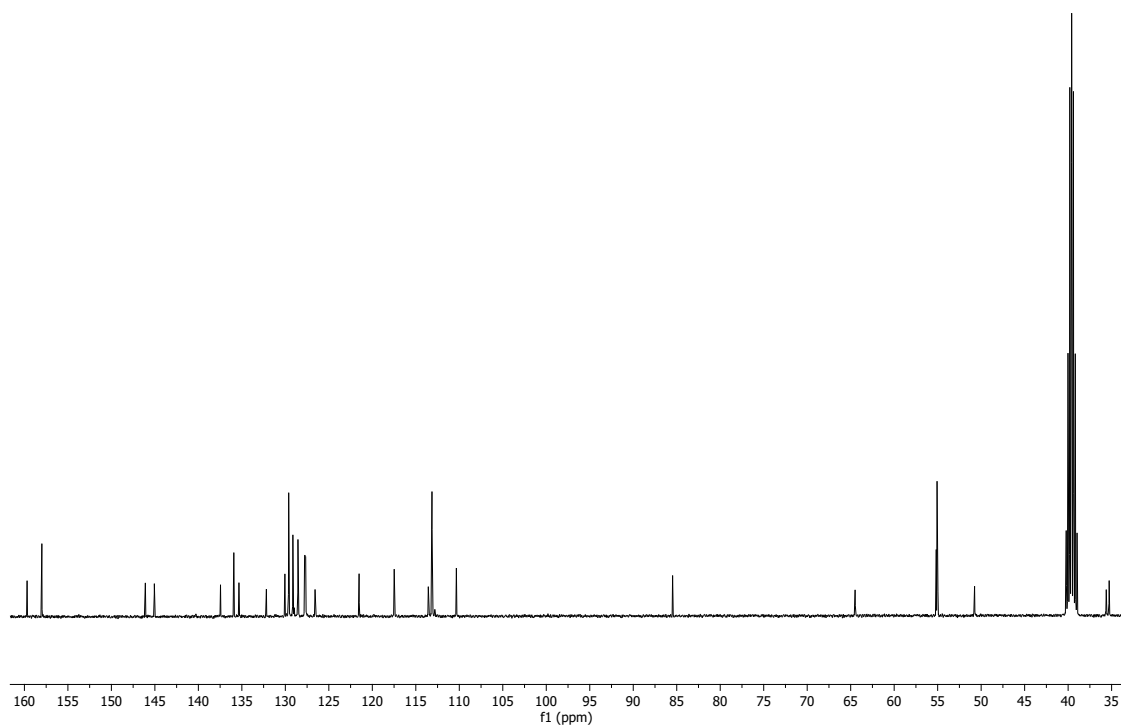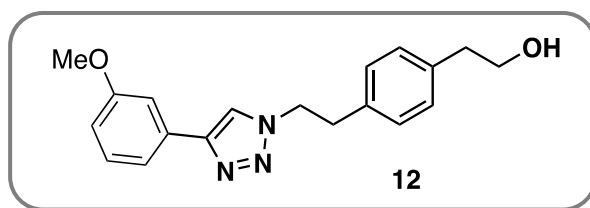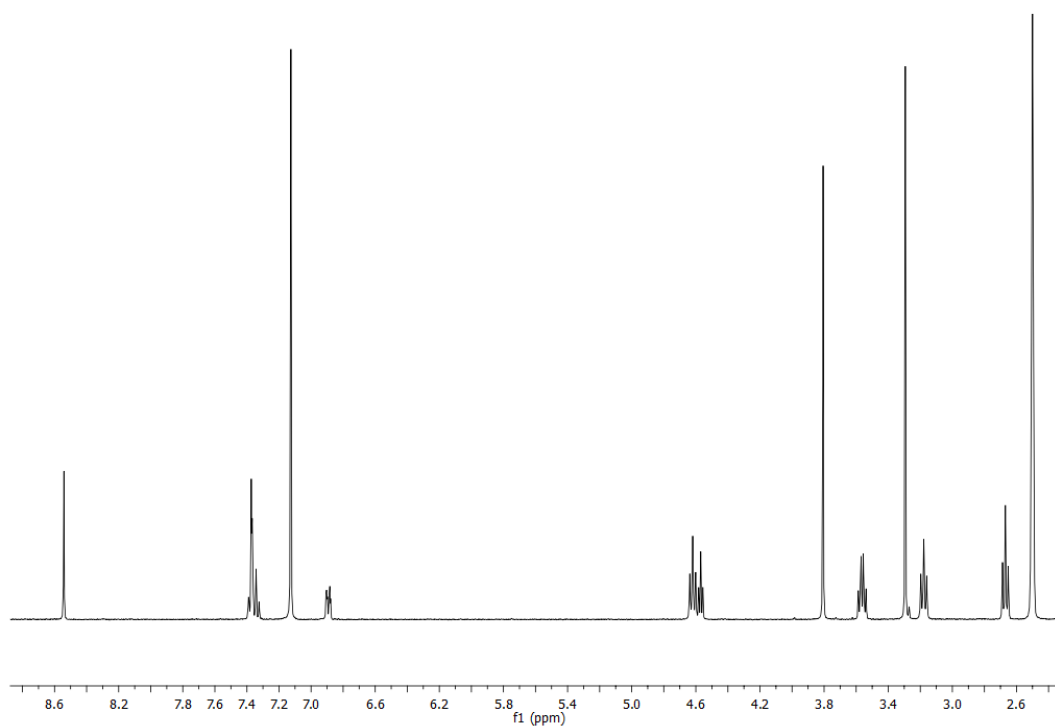

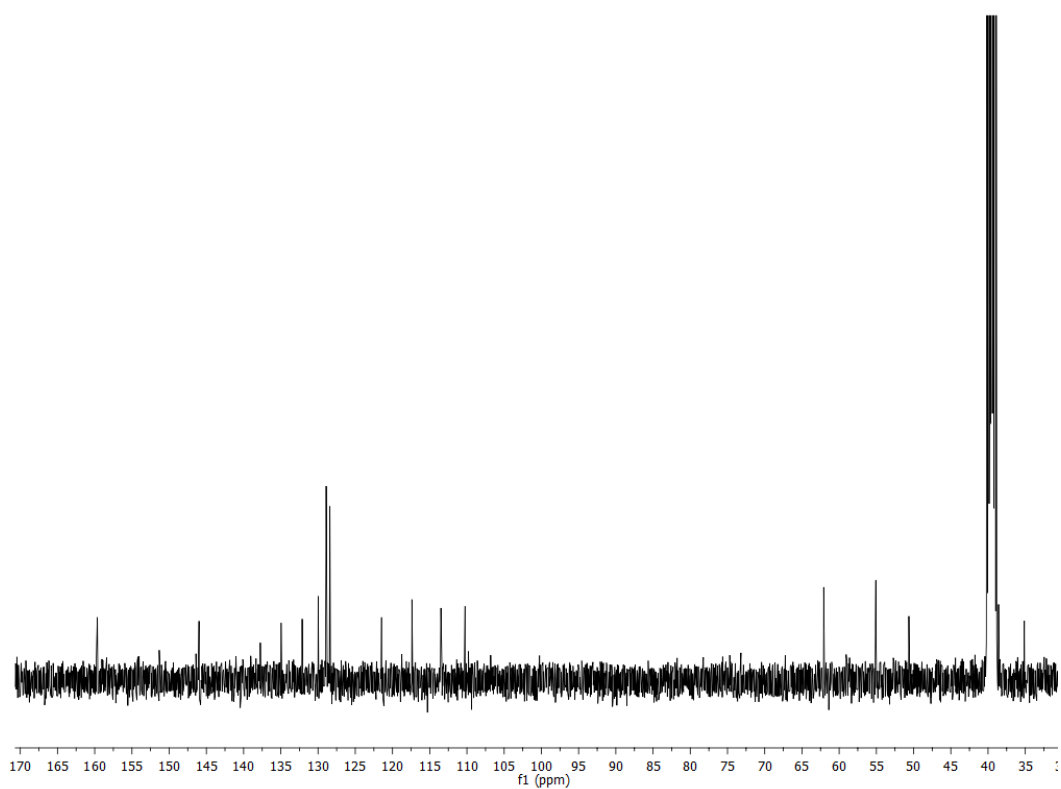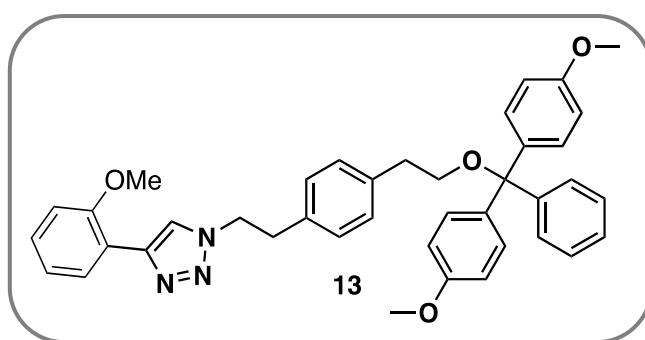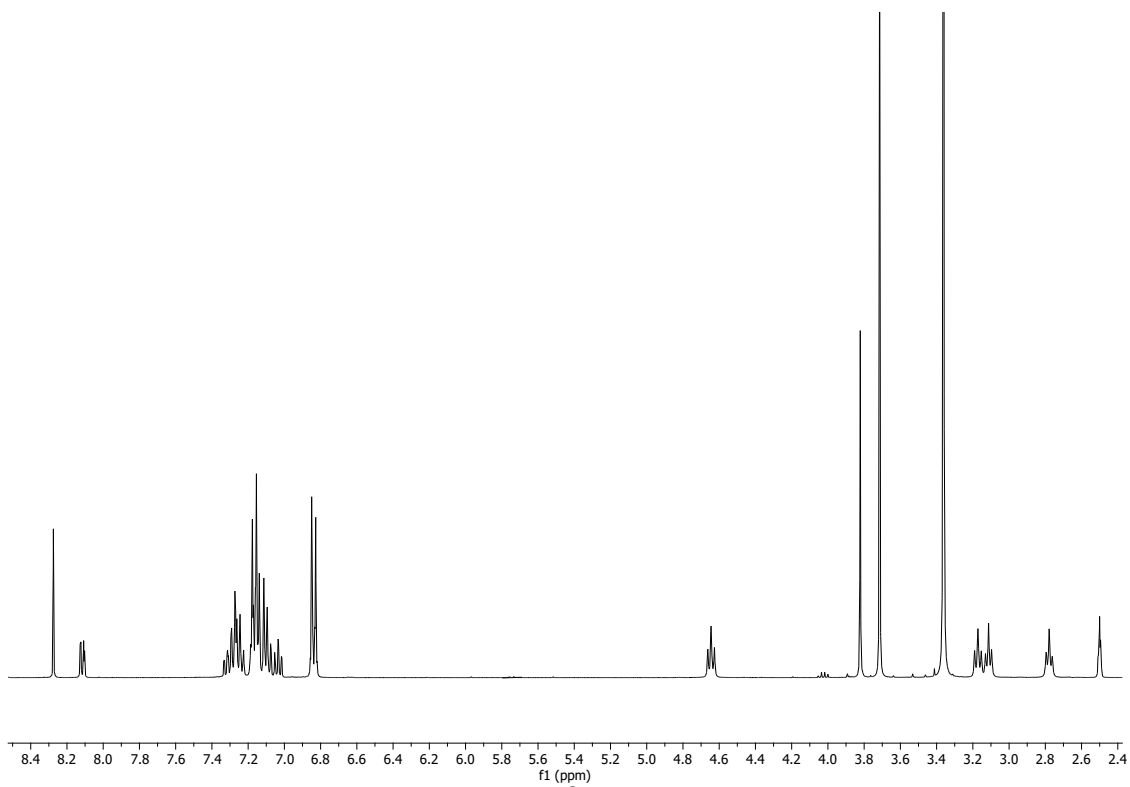

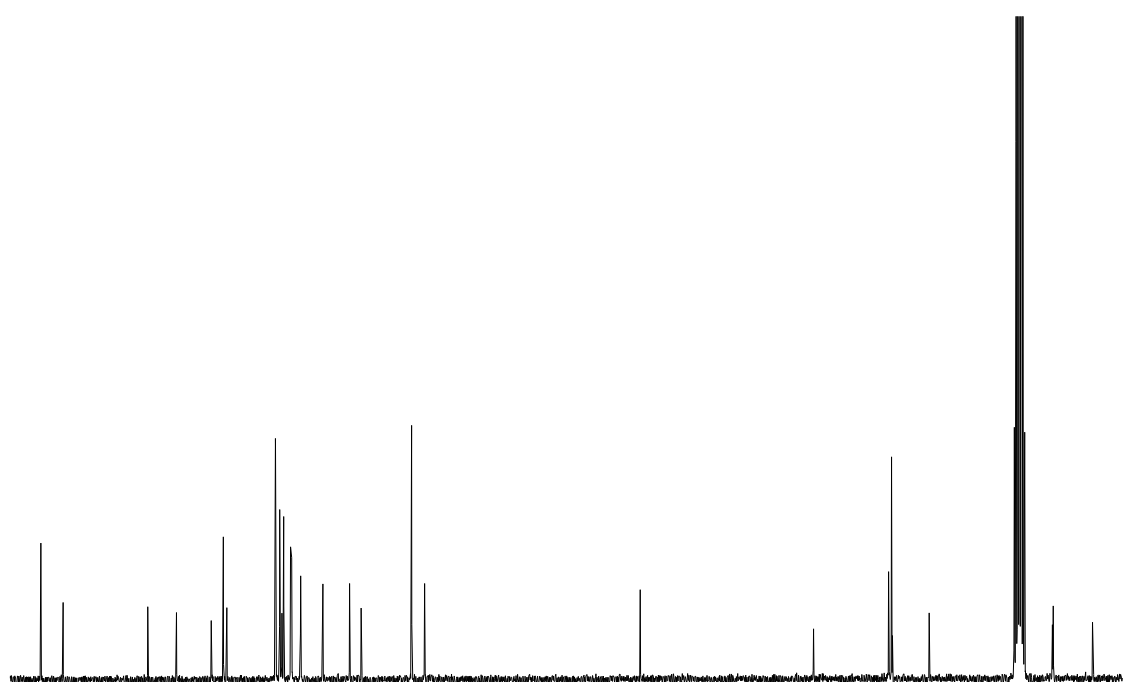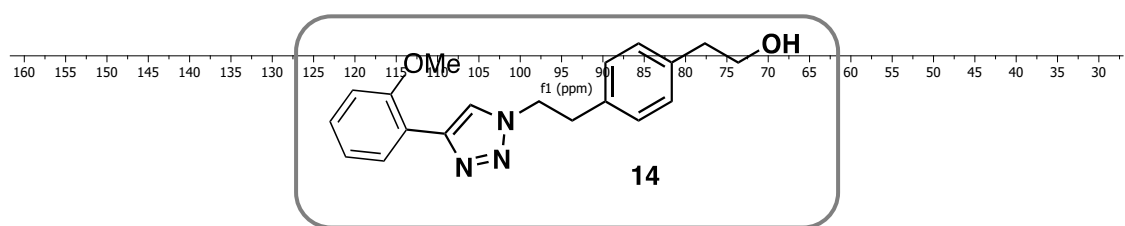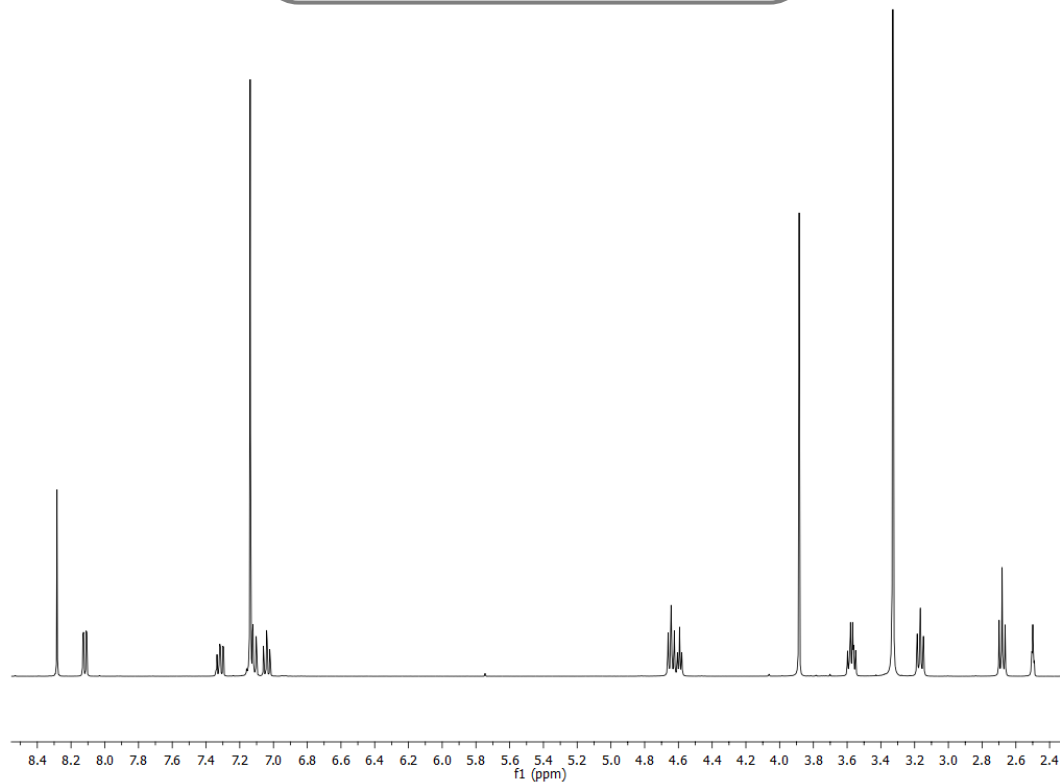

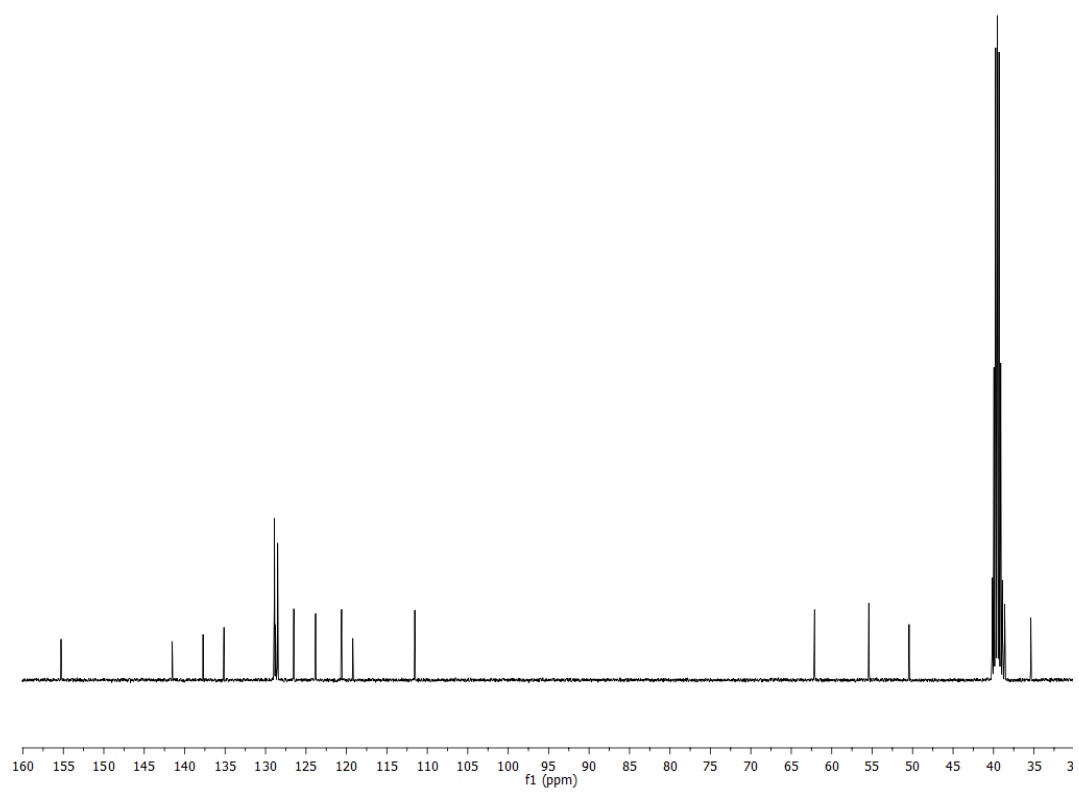

Supplement: s1 [file s1]
